# Supplementary material for: Differences in the immune response elicited by two immunization schedules with an inactivated SARS-CoV-2 vaccine in a randomized phase 3 clinical trial
Source: eLife. 2022 Oct 13;11:e81477. doi: 10.7554/eLife.81477 (PMC9596164; doi:10.7554/eLife.81477)
Supplement: Figure 1—figure supplement 2—source data 1. [file elife-81477-fig1-figsupp2-data1.xlsx]

## Sheet: Figure S2
Figure S2
	0-14 Schedule
Preimmune	2	2	2	2	2	2	2	2	2	2	2	2	2	2	2	2	2	2	2	2	2	2	2	2	2	2	2	2	2	2	2	2	2	2	2	2	2	2	2	2	2	2	2	2	2	2	2	2	2
2w after 2nd dose	82.95	32.95	247.4	110	32.98	147.7	70.86	5.529	13.34	51.56	53.97	95.31	33.93	4.007	14.87	72.79	36.09	51.85	85.14	103.2	33.47	54.62	79.8	79.65	339.5	281.5	26.98	288.1	585.9	91.06	277.1	105.6	137	0.8892	51.73	26.88	902.4	225	124.6	49.67	37.15	156.2	1.61	11621	58.59	4326	16.18	76.48	501
4w after 2nd dose	52.91	17.31	104	67.73	28.18	58.14	50.3	4.363	5.177	44.12	96.79	76.84	21.93	10.32	21.19	50.98	17.45	26.11	60.36	200.1	16.69	30.11	50.61	35.77	362.7	151.8	33.59	197.8	265.2	275.1	133.5	101.1	80.36	1.841	42.91	25.55	868.4	169.7	110.7	19.04	45.5	104.1	18.7	8706	49.45	598.2	7.083	11.67	245.8
Figures 5 and Figure 1-Figure supplement 3 were also generated with these data.
[truncated: 44 more columns]
