# Supplementary material for: Differences in the immune response elicited by two immunization schedules with an inactivated SARS-CoV-2 vaccine in a randomized phase 3 clinical trial
Source: eLife. 2022 Oct 13;11:e81477. doi: 10.7554/eLife.81477 (PMC9596164; doi:10.7554/eLife.81477)
Supplement: Figure 1—source data 1. [file elife-81477-fig1-data1.xlsx]

## Sheet: Figure 1
Figure 1A and C
	0-14 Schedule
Preimmune	16.4	16.4	16.4	16.4	16.4	16.4	16.4	16.4	16.4	16.4	16.4	16.4	16.4	16.4	16.4	16.4	16.4	16.4	16.4	16.4	16.4	16.4	16.4	16.4	16.4	16.4	16.4	16.4	16.4	16.4	16.4	16.4	16.4	16.4	16.4	16.4	16.4	16.4	16.4	16.4	16.4	17.4	16.4	16.4	16.4	16.4	16.4	16.4	16.4
2w after 2nd dose	365.57	69.13	246.77	181.55	30.1	99.46	16.4	16.4	156.73	404.54	23.32	22.607	40.936	93.39	26.902	39.32	70.942	33.627	75.747	206.48	41.29	202.31	937.33	58.27	144.39	18.925	139.44		16.4	979.08	24.652	129.37	22.176	27.981	84.011	73.53			16.4	46.59	16.4	26.66	16.4	27.89	16.4	16.4	16.4	16.71	16.4
4w after 2nd dose	381.34	29.348	112.98	79.426	22.058	94.255	16.4	16.4	91.808	787.3	25.591	34.731	42.875	81.938	30.099	53.658	89.912	26.397	107.88	209.47	39.242	245.97	615.02	67.412	93.53	16.4	78.387	102.28	16.4	686.49	20.185	139.87	22.129	27.667	504.23	107.95	44.873	69.71	16.4	57.58	24.76	29.18	16.4	26.87	19.36	16.4	16.4	29.89	16.4
Figure 1 B and D
	0-14 Schedule
Preimmune	2	2	2	2	2	2	2	2	2	2	2	2	2	2	2	2	2	2	2	2	2	2	2	2	2	2	2	2	2	2	2	2	2	2	2	2	2	2	2	2	2	2	2	2	2	2	2	2	2
2w after 2nd dose	192	8	128	32	256	128	96	24	32	24		128	96	8	8	16	192		24	64	256	48	32			32	256	16	96	768	8	48	24	128			64	124		24	192		16	96	128	96		96	24
4w after 2nd dose	384	24	48	64	96	96	64	8	32	96	24	128	48	16	8	6	32		32	64	192	24	24	16		48	64	12	48	192	12	48	24	128	16	128	24	256		12	128	96	16	24	96	24	64	48	12
Figures 5 and Figure 1-Figure supplement 3 were also generated with these data.
[truncated: 347 more columns]
