# Supplementary material for: Differences in the immune response elicited by two immunization schedules with an inactivated SARS-CoV-2 vaccine in a randomized phase 3 clinical trial
Source: eLife. 2022 Oct 13;11:e81477. doi: 10.7554/eLife.81477 (PMC9596164; doi:10.7554/eLife.81477)
Supplement: Figure 2—source data 1. [file elife-81477-fig2-data1.xlsx]

## Sheet: Figure 2
Figure 2A
	0-14 Schedule
Preimmune	1	1	1	1	1	1	1	1	1	1	1	1	1	1	1	1	1	1	1	1	1	1	1	1	1	1	1	1	1	1	1	1	1	1	1	1	1	1	1	1	1	1	1	1	1	1	1	1	1
2w after 2nd dose	55.0541	20.0255	9.97295	14.3325	5.2883	65.263	1.20473	5.9437	14.0775	130.861	22.8523	7.46585	1.03723	3.52992	9.24277	10.7287	36.9166	8.03959	2.75089	4.15718	39.3101	10.0103	2.63593	10.8163	3.21366	21.4431	9.27928	4.18464		57.4852	34.3941	53.2642	6.79667	23.9188	1.38471	5.82611	9.40453	17.4743	6.03991	7.9268	19.3814	30.0074	2.24603	2.81334	2.55187	44.5257	7.46496	8.25924	3.35593
4w after 2nd dose	53.5463	16.3492	9.28689	10.0433	6.23431	32.4512	2.15578	5.40959	14.1742	778.542	19.4579	6.49328	0.983992	17.7476	18.3864	22.6517	88.4581	23.9874	2.71032	3.86368	38.8684	9.95827	2.55527	7.18936	1.8545	14.2804	6.92131	3.19875	10.3443	33.1392	28.8202	39.8479	6.41011	22.252	2.1885	6.23377	8.1776	0.432791	5.56254	1.14022	26.26	9.38238	0.386315	4.69048	1.69757	28.4764	10.0122	10.7281	2.91629
Figure 2B
	0-14 - 4w after 2nd dose																																												0-28 - 4w after 2nd dose
Anti-Spike	65.01	53.86	214.73	12.5	112.92	566.02	34.45	62.45	27.32	122.9	111.7	32.66	260.02	33.82	136.38	1203.73	147.02	56.97	221.23	179.66	125.89	113.83	128.42	494.52	191.16	732.69	781.23	253.35	369.14	114.3	292.21	114.14	167.08	35.45	213.87	81.77	436.9	158.76	222.3	26.91	144.05	474.11	260.96	265.89	101.45	157.85	245.57	118.23	79.36
Anti-RBD	144.18	90.87	258.03	30.63	139.53	638.81	46.34	114.07	74.07	198.38	103.83	39.58	365.82	61.27	242.88	1810.5	200.67	127.35	447.97	405.09	281.59	350.51	208.78	589.34	457.04	1535.95	1362.14	420.42	402.45	267.68	601.63	86.45	241.97	82.36	377.05	106.44	863.56	265.29	455.27	44.53	237.9	792.65	285.42	543.52	174.95	349.45	298.18	145.87	188.72
[truncated: 116 more columns]
