# Supplementary material for: Differences in the immune response elicited by two immunization schedules with an inactivated SARS-CoV-2 vaccine in a randomized phase 3 clinical trial
Source: eLife. 2022 Oct 13;11:e81477. doi: 10.7554/eLife.81477 (PMC9596164; doi:10.7554/eLife.81477)
Supplement: Figure 3—figure supplement 3—source data 1. [file elife-81477-fig3-figsupp3-data1.xlsx]

## Sheet: Figure S8
Figure S8A
	0-14 Schedule
Preimmune	0	1	0	0	0	13	0	0	0	1	0	24	0	0	0	0	0	0	0	0	1	2	0	12	0	0	1	1	0	1	0	0	0	1	1	0	0	0	0	0	0	0	0	0	0	0	0	0	0
2w after 2nd dose	37	1	0	0	1	63	0	0	0	1	0	0	0	2	0	0	0	1	0	0	12	7	0	0	1	0	0	0	1	1	0	0	0	0	0	0	0	0	0	0	5	0	0	0		2	2	1	10
4w after 2nd dose	0	0	0	0	0	0	0	4	0	0	1	0	0	5	0	0	3	0	1	2	8	3	0	0	4	1	1	0	1	0	0	0	0	0	0	0	0	1	0	0	1	0	0		0		0		0
Figure S8B
Preimmune	0	0	0	0	1	0	0	0	0	0	0	0	0	1	1	1	1	0	0	0	0	0	1	1	0	0	0	0	2	1	0	2	0	0	0	0	0	0	0	0	0	0	0	1	0	0	1	0	0
2w after 2nd dose	0	0	0	0	0	0	0	1	0	0	0	0	0	0	11	3	2	0	0	1	0	0	0	0	0	0	0	0	0	0	0	0	0	0	0	0	5	0	0	0	0	1	0	0	0	0	1	0	0
4w after 2nd dose	1		4	0		0	0	0	0	1	0	0	1	3	12	3	0	0	2	0	0	0	0	0	0	0	0	1	0	1	0	0	0	0	1	6	0			10		0	0	0		0	0	0	0
Figure 5 was also generated with these data.
[truncated: 79 more columns]
