# Supplementary material for: Differences in the immune response elicited by two immunization schedules with an inactivated SARS-CoV-2 vaccine in a randomized phase 3 clinical trial
Source: eLife. 2022 Oct 13;11:e81477. doi: 10.7554/eLife.81477 (PMC9596164; doi:10.7554/eLife.81477)
Supplement: Figure 3—source data 1. [file elife-81477-fig3-data1.xlsx]

## Sheet: Figure 3
Figure 3A
	0-14 Schedule
Preimmune	86	27	0	9	0	20	0	11	37	89	530	20	0	4	8	17	1	1	0	3	0	32	13	8	14	12	3	8	0	6	0	86	0	6	37	0	55	1	0	0	0	2	0	1	9	1	4	29	128
2w after 2nd dose	10	53	55	4	1	81	133	36	114	11	103	53	52	5	0	45	50	268	27	70	50	47	6	25	0	106	0	0	27	2	53	331	0	37	0	0	117	10	0	0		0	0	3	94	169	47		0
4w after 2nd dose	137	0	100	0	7	171	128	29	0	183	93	85	21	33	106	15	260	63	80	0	46	44	51	156	9	29	5	56	0	20	19	0	0	6	0	52	81	3	183	36	5	69	93	0	3	25	0	5	28
Figure 3B
Preimmune	101	7	0	117	17	20	31	0	0	2	19	0	0	0	11	0	30	1	13	8	1	4	1	28	9	0	77	0	33	7	11	7	4	89	1	3	0	19	13	440	83	21	0	88	0	31	0	0	0
2w after 2nd dose	232	0	0	93	37	8	8	1	0	2	0	4	58	9	22	2	87	0	2	0	10	0	0	52	16	0	0	0	0	0	8	12	5	0	20	0	104	9	17	124	4	0	0	68	15	28	57	1	3
4w after 2nd dose	36	505	49	225	0	50	2	9	8	9	8	78	39	117	162	0	29	0	118	0	0	2	53	26	33	1	0	0	0	0	0	0	9	256	453	0	71	0	52	128	2	10	0	0	0	34	15	1	0
Figure 3C
	0-14 Schedule
Preimmune	0.11	0.01	0	0	0	0	0	0.48	0.066	0	0.01	0.01	0.05	0.19	0	0.56	0.45	0.039	0	0	0.3	0.102	0	0.68	0	0.01	0	0.02	0	0	0	0	0	0	0.57	0.42	0.11	0.36	0.28	0	0.07	0	0.39	1.15	1.09	0.118	0.12	0	0
2w after 2nd dose	1.88	0.34	0	0.23	0.09	0.488	0.804	0.02	0.09	0.06	0.61	0.65	0.99	0	0.05	0.29	0.14	0.54	0	2.59	1.01	0.08	0.33	0.88	0.41	0.05	0.21	0.01	0.18	0	0.02	0	0.01	0	0	1.47	0.32	0	0.31	0	0.42	0.052	1.33	0	1.41	0.66	0.05	0.09	0
4w after 2nd dose	0	0.261	0.01	0	0	0	0.118	0.86	0.368	3.19	0.83	0.24	0.63	0.09	0.28	0.12	0.08	0.157	0	0.27	0.31	0	0	0.08	0.06	0	0.1	0.02	0.08	0	0.02	0	0.01	0.96	0	0.5	0.1	0.36	0.45	0.1	0.25	0.035	0.62	0.06	1.45	0.051	0.23	0.24	0
Figure 3D
	0-14 Schedule
Preimmune	0.07	0	0.12	0.56	0.019	0.94	0.33	0.2	1.05	0.168	0	0.76	0.029	0.06	0.54	0.64	0.52	0	1.16	0	0	0	0.42	0	0	0	0	0	0	0.12	0.13	0	0.02	0.17	0.1	0.15	0.03	0	6.09	0	0	0.19	0	0.073	0	0.039	0	0.05	0
2w after 2nd dose	0	0.37	0	0.2	0.008	0.19	0.4	0.52	2.81	0.156	0.31	0.41	0.04	0.52	2.45	0.32	0	0	0	1.39	0.57	0	0	0.02	0	0	0	0	0.55	0.61	0	0	0	0	0	0	1.2	0	0.22	1.05	0.14	0	0	0	0.07	0	0	0.24	0
4w after 2nd dose	1.98	1.25	0	1.54	0.061	0.19	0.71	0.122	0	0.15	0.34	0.58	0.019	0.69	3.66	2.65	9.64	0	0.16	0	0	0	1.7	0	0	0.47	0	0	0	0.1	0.13	0	0	0.57	0.1	0	1.3	0	0	0	0.29	0.1	0.04	0.03	0.09	0	1.4	0	2.05
Figures 5 and Figure 3-Figure supplement 1, 2, and 3 were also generated with these data.
[truncated: 74 more columns]
