# Supplementary material for: Differences in the immune response elicited by two immunization schedules with an inactivated SARS-CoV-2 vaccine in a randomized phase 3 clinical trial
Source: eLife. 2022 Oct 13;11:e81477. doi: 10.7554/eLife.81477 (PMC9596164; doi:10.7554/eLife.81477)
Supplement: Figure 4—source data 1. [file elife-81477-fig4-data1.xlsx]

## Sheet: Figure 4
Figure 4A
	0-14 - 4w after 2nd dose																																												0-28 - 4w after 2nd dose
Alpha	45.86	43.67	163.14	9.61	92.84	451.39	22.43	41.54	20.57	73.95	85.73	23.25	213.7	25.32	97.42	879.54	92.86	44.34	131.5	122.63	81.64	63.43	76.13	310.74	124.72	406.65	538.46	166.11	217.31	64.79	157.03	82.72	101.56	22.67	125.67	48.48	258.17	101.32	118.06	18.32	99	175.58	89.95	88.88	58.88	88.42	173.78	43.26	44.33
Beta	22.24	17.47	80.26	4.38	37.49	232.56	10.54	18.38	8.32	44.09	49.01	7.08	93.43	13.86	52.3	442.36	44.3	23.03	54.32	37.52	50.36	28.8	46.68	109.38	46.84	164.58	238.83	92.37	132.97	30.44	89.72	55.12	55.67	8.8	54.59	41.67	115.05	50.32	50	7.46	41.86	192.64	95.63	98.37	41.44	42.82	103.58	16.79	20.41
Gamma	48.81	35.25	181.87	9.42	87.56	490.85	30.09	42.48	21.98	102.74	99.35	23.81	211.64	28.23	103.85	954.24	78.71	41.94	111.44	90.05	101.06	75.67	83.11	245.67	103.08	556.67	500.41	166.64	319.96	57.62	203.29	74.26	116.9	25.02	162.88	74.22	337.32	126.05	125.03	17.01	94.67	169.63	83.46	85.92	80.52	107.67	175.21	85.31	47.74
Delta	21.39	20.29	101.51	5.59	32.5	269.95	11.39	25	10.1	44.37	53.78	9.92	105.43	12.21	62.49	619.74	37.95	23.34	78.91	57.03	48.3	40.11	71.71	125.97	74.9	245.02	306.02	127.2	159.89	46.92	128.49	58.62	54.3	10.86	82.37	37.56	161.19	68.52	62.6	11.19	54.66	113.18	53.42	39.32	41.14	55.16	125.14	19.46	30.7
Omicron	18.69	12.42	57.6	4.7	23.33	197.19	8.47	13.46	8.39	27.89	30.37	6.61	60.65	13.04	46.83	318.49	39.1	15.23	38.56	33.7	32.82	27.44	32.15	114.96	41.36	224.35	228.14	68.8	129.34	31.3	102.29	23.24	52.77	7.17	59.59	48.31	125.75	53.57	47.63	5.63	49.2	261.76	176.62	143.96	46.43	31.56	95.4	19.63	20.81
Figure 4B
	0-14 - 4w after 2nd dose																																												0-28 - 4w after 2nd dose
Alpha	103.65	65.45	193.5	20.97	121.7	517.69	36.8	61.16	57.73	132.28	75.09	28.54	311.79	41.28	193.71	1436.77	143.71	83.96	237.7	262.89	219.95	237.22	127.14	480.59	361.17	1170.33	1044.4	283.93	325.01	162.38	513.51	67.01	175.53	60.08	267.99	82.8	650.15	200.67	313.75	27.96	186.16	620.4	210.14	397.84	135.28	271.01	228.32	105.42	131.7
Beta	42.17	24.18	106.31	11.02	58.33	254.41	14.92	35.19	26.22	58.94	32.26	11.38	130.29	20.89	117.06	672.72	71.88	42.4	104.15	69.53	154.96	146.78	81.23	224.71	137.63	544.89	417.61	181.06	195.04	76.26	318.23	28.18	106.99	28.04	107.77	42.68	350.79	90.83	103.17	12.61	84.87	285.44	91.25	158.41	76.52	119.27	105.53	37.63	59.43
Gamma	70.27	42.81	164.96	17.17	75.87	311.49	20.68	52.88	37.95	92.58	51	19.94	175.26	33.62	179.35	855.62	94.49	71.24	190.51	109.42	208.78	200.16	113.1	318.82	185.64	656.77	554.86	235.39	282	103.35	426.34	42.36	145.94	44	156.65	57.32	470.14	128.14	168.4	20.78	115.32	407.34	132.51	222.94	97.44	164.53	173.93	59.9	84.81
Delta	150.17	98.17	330.31	34.62	105.97	585.02	41.45	105.17	74.96	166.01	125.1	43.64	326.15	59.43	286.68	1835.17	163.02	137.45	376.71	285.28	267.67	345.38	254.83	685.38	382.02	1399.71	1113.19	491.1	515.99	214.22	801.93	106.32	228.41	92.68	398.38	96.65	877.6	277.71	373.17	58.99	223.77	667.1	336.59	485.04	176.4	349.91	418.21	97.56	185.68
Omicron	19.8	12.33	61.04	10.54	24.13	132.57	7.43	11.9	17.84	19.85	22.12	10.28	63.77	9.15	38.96	281.22	16.86	22.81	32.39	24.54	56.37	28.56	37.89	187.31	38.06	254.14	244.89	109.84	137.73	32.2	231.24	12.54	32.13	10.91	30.62	20.02	105.2	36.83	88.15	6.75	36.33	139.24	47.73	49	39.23	55.15	176.53	22.4	18.24
Figure 4C
	0-14 - 4w after 2nd dose																																												0-28 - 4w after 2nd dose
Alpha	0.70543	0.810806	0.759745	0.7688	0.822175	0.797481	0.651089	0.665172	0.752928	0.601709	0.767502	0.71188	0.82186	0.748669	0.714328	0.730679	0.631615	0.778304	0.594404	0.682567	0.648503	0.557234	0.59282	0.628367	0.652438	0.55501	0.689246	0.655654	0.588693	0.566842	0.537388	0.724724	0.607853	0.639492	0.5876	0.592882	0.590913	0.638196	0.531084	0.680788	0.687261	0.370336	0.344689	0.334274	0.580384	0.560152	0.70766	0.365897	0.558594
Beta	0.342101	0.324359	0.373772	0.3504	0.332005	0.410869	0.305951	0.294315	0.304539	0.358747	0.438765	0.216779	0.359319	0.409817	0.383487	0.367491	0.30132	0.404248	0.245536	0.208839	0.400032	0.253009	0.363495	0.221184	0.24503	0.224624	0.30571	0.364594	0.360216	0.266317	0.307039	0.482916	0.333194	0.248237	0.255249	0.5096	0.263333	0.316956	0.224921	0.27722	0.290594	0.406319	0.366455	0.369965	0.408477	0.27127	0.421794	0.142011	0.257182
Gamma	0.750808	0.654475	0.846971	0.7536	0.775416	0.867196	0.87344	0.680224	0.804539	0.835964	0.889436	0.729026	0.813937	0.834713	0.761475	0.792736	0.535369	0.736177	0.503729	0.501225	0.802764	0.664763	0.647173	0.496785	0.539234	0.759762	0.640541	0.657746	0.866771	0.504112	0.695698	0.650605	0.699665	0.705783	0.761584	0.907668	0.772076	0.793966	0.562438	0.632107	0.657202	0.357786	0.319819	0.323141	0.793691	0.682103	0.713483	0.72156	0.601562
Delta	0.329026	0.376717	0.472733	0.4472	0.287814	0.476927	0.330624	0.40032	0.369693	0.361025	0.481468	0.303735	0.405469	0.361029	0.458205	0.51485	0.258128	0.409689	0.356688	0.317433	0.383668	0.352368	0.558402	0.254732	0.391818	0.334412	0.391716	0.502072	0.433142	0.410499	0.439718	0.51358	0.324994	0.306347	0.385141	0.459337	0.36894	0.431595	0.281601	0.415831	0.379452	0.238721	0.204706	0.147881	0.40552	0.349446	0.50959	0.164594	0.386845
Omicron	0.287494	0.230598	0.268244	0.376	0.206606	0.34838	0.245864	0.215532	0.307101	0.226932	0.271889	0.202388	0.233251	0.385571	0.343379	0.264586	0.26595	0.267334	0.174298	0.187577	0.260704	0.241061	0.25035	0.232468	0.216363	0.3062	0.292027	0.271561	0.350382	0.273841	0.350056	0.20361	0.315837	0.202257	0.278627	0.590803	0.287823	0.337428	0.21426	0.209216	0.341548	0.552108	0.676809	0.541427	0.457664	0.199937	0.388484	0.166032	0.262223
Figure 4D
	0-14 - 4w after 2nd dose																																												0-28 - 4w after 2nd dose
Alpha	0.718893	0.72026	0.749913	0.684623	0.872214	0.810397	0.79413	0.536162	0.779398	0.666801	0.723201	0.721071	0.852304	0.673739	0.797554	0.793576	0.716151	0.659285	0.530616	0.648967	0.7811	0.676785	0.608966	0.815472	0.790237	0.761958	0.766735	0.675348	0.807579	0.60662	0.853531	0.77513	0.725421	0.72948	0.710755	0.777903	0.752872	0.756418	0.689151	0.627891	0.782514	0.782691	0.736248	0.731969	0.77325	0.775533	0.765712	0.722698	0.697859
Beta	0.292482	0.266094	0.412006	0.359778	0.418046	0.398256	0.321968	0.308495	0.353989	0.297107	0.3107	0.287519	0.356159	0.34095	0.481966	0.371566	0.3582	0.332941	0.232493	0.171641	0.550304	0.418761	0.38907	0.381291	0.301133	0.354758	0.306584	0.430665	0.484632	0.284892	0.528946	0.325969	0.442162	0.340457	0.285824	0.400977	0.406214	0.34238	0.226613	0.28318	0.356747	0.360108	0.319704	0.291452	0.437382	0.341308	0.353914	0.257969	0.314911
Gamma	0.487377	0.471113	0.639306	0.560562	0.543754	0.48761	0.446267	0.463575	0.512353	0.46668	0.491188	0.50379	0.479088	0.548719	0.73843	0.472588	0.470873	0.559403	0.425274	0.270113	0.741433	0.571054	0.541719	0.540978	0.406179	0.427599	0.407344	0.559892	0.700708	0.386095	0.708642	0.489994	0.603133	0.53424	0.415462	0.538519	0.544421	0.483019	0.36989	0.466652	0.484741	0.513896	0.464263	0.410178	0.556959	0.470826	0.583305	0.41064	0.449396
Delta	1.04155	1.08033	1.28012	1.13026	0.759478	0.915797	0.894476	0.921978	1.01202	0.836828	1.20485	1.10258	0.891559	0.969969	1.18034	1.01363	0.812379	1.07931	0.840927	0.704239	0.950566	0.985364	1.22057	1.16296	0.835857	0.911299	0.817236	1.16812	1.28212	0.800284	1.33293	1.22984	0.94396	1.1253	1.05657	0.908023	1.01626	1.04682	0.819667	1.32472	0.940605	0.841607	1.17928	0.892405	1.00829	1.00132	1.40254	0.668815	0.983891
Omicron	0.137328	0.135688	0.236562	0.344107	0.172938	0.207526	0.160337	0.104322	0.240853	0.10006	0.213041	0.259727	0.174321	0.149339	0.160408	0.155327	0.0840185	0.179113	0.072304	0.0605791	0.200185	0.0814813	0.181483	0.31783	0.083275	0.165461	0.179783	0.261263	0.342229	0.120293	0.384356	0.145055	0.132785	0.132467	0.0812094	0.188087	0.121821	0.138829	0.193621	0.151583	0.152711	0.175664	0.167227	0.0901531	0.224236	0.157819	0.592025	0.153561	0.0966511
Figure 4-Figure supplement 1, 2, and 3 were also generated with these data.
[truncated: 35 more columns]
